# Supplementary material for: Building an innovative Chagas disease program for primary care units, in an urban non- endemic city
Source: Springer Nature journal article supplement (doi:10.1186/s12889-019-7248-5), 2019-07-08

---

Code Number:

School Number:

Grade:

Turn:

Date:

---

### Questions for the pupil

Name and Surname:

DNI:

Date of birth:

Phone number:

Place of birth: Province of Argentina

Bolivia  Paraguay  Peru  Other country

Had you ever receive a blood transfusion?  No  Yes

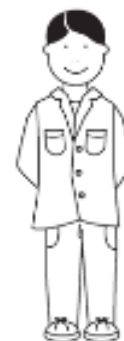

---

### Questions for the mother

Name and Surname:

DNI:

Date of birth:

Phone number:

Place of birth: Province of Argentina

Bolivia  Paraguay  Peru  Other country

Had you ever receive a blood transfusion?  No  Yes

Have you had a positive blood test for Chagas disease during your pregnancy?

Yes  No

---

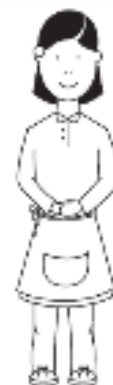

Supplement: MOESM1 [file 16907478]
